# Supplementary material
Source: Springer Nature journal article supplement (https://www.springermedizin.de/resource/supplementary/13054_2013_1930_MOESM2_ESM.pdf/9711954)

### Weaning success

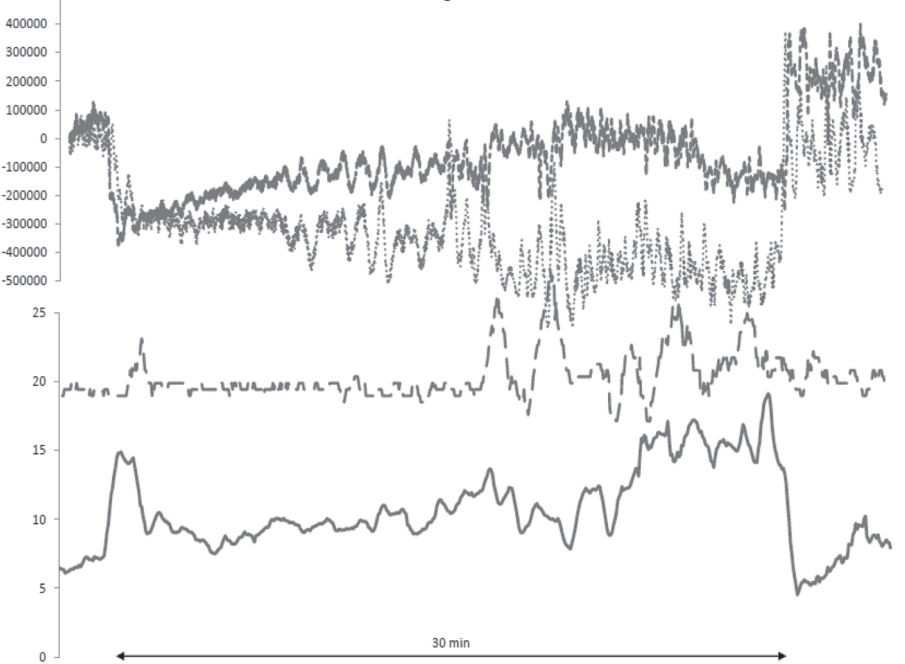

### Weaning failure

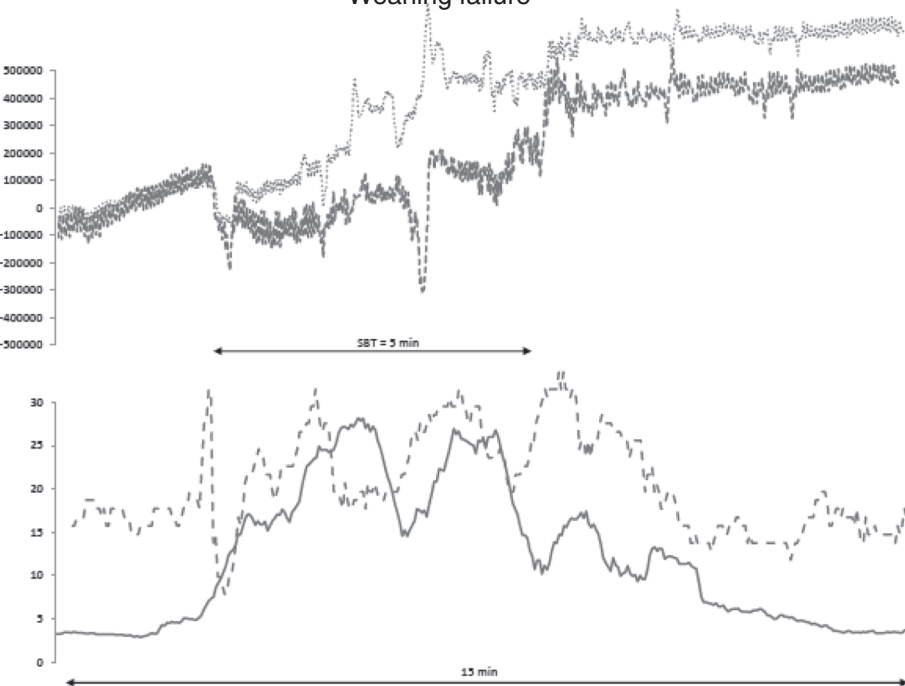

Supplement: MOESM2 [file 9711954]
